# Supplementary material for: Polymorphs of the Gadolinite‐Type Borates ZrB2O5 and HfB2O5 Under Extreme Pressure
Source: PubMed Central journal article supplement — Chemistry. 2021 Mar 3;27(19):6007–14. doi: 10.1002/chem.202005244 (PMC8049040; doi:10.1002/chem.202005244), 2021-03-03
Supplement: CHEM-27-6007-s001.pdf [file CHEM-27-6007-s001.pdf]

# Chemistry–A European Journal

Supporting Information

## Polymorphs of the Gadolinite-Type Borates $\text{ZrB}_2\text{O}_5$ and $\text{HfB}_2\text{O}_5$ Under Extreme Pressure

Anna Pakhomova<sup>+, \*<sup>[a]</sup></sup> Birgit Fuchs<sup>+, <sup>[b]</sup></sup> Leonid S. Dubrovinsky,<sup>[c]</sup> Natalia Dubrovinskaia,<sup>[d, e]</sup> and  
Hubert Huppertz<sup>\*<sup>[b]</sup></sup>

## **Table of contents**

|                                                   |    |
|---------------------------------------------------|----|
| <b>Experimental Procedures</b> .....              | 2  |
| Synchrotron measurements .....                    | 2  |
| Single-crystal X-ray diffraction refinement ..... | 2  |
| <b>Results and Discussion</b> .....               | 3  |
| <b>References</b> .....                           | 13 |

# Experimental Procedures

## Synchrotron measurements

*In situ* high-pressure single-crystal diffraction experiments (SCXRD) were performed at the experimental station P02.2 (Extreme Conditions Beamline) at the synchrotron Petra III (Hamburg, Germany). Symmetric diamond anvil cells (DACs) with culets diameter of 150  $\mu\text{m}$  were used for pressure generation. The sample chamber with an approximate diameter of 75  $\mu\text{m}$  was obtained by drilling the preindented (up to  $\sim 20$   $\mu\text{m}$ ) rhenium gasket. Preselected single-crystals of  $\beta\text{-ZrB}_2\text{O}_5$  and  $\beta\text{-HfB}_2\text{O}_5$  were placed inside the sample chamber along with a ruby sphere for pressure estimation. The DAC was loaded with neon as pressure-transmitting medium using the in-house gas loading system at Petra III. Monochromatic X-ray diffraction experiments were performed using X-rays with a wavelength of  $\sim 0.29$   $\text{\AA}$ . The X-ray beam was focused to  $\sim 2 \times 2$   $\mu\text{m}^2$  by Kirkpatrick-Baez mirrors. Diffraction patterns were collected using a Perkin Elmer 1621 detector. Before the experiment, the detector-sample-distance, coordinates of the beam center, tilt angle, and tilt plane rotation angle of the detector images were calibrated with a  $\text{CeO}_2$  standard using the procedure implemented in the program Dioptas.<sup>[1]</sup>

At each pressure, both a wide-scan and a stepped  $\omega$ -scan were collected for each crystal. The wide-scans consisted of 40 s exposures during rotations of  $\pm 20^\circ$  of the DAC, while the step scans consisted of individual exposures taken with  $0.5^\circ$  intervals over the entire opening angle of the cell of  $32^\circ$ . For the analysis of the single-crystal diffraction data (indexing, data integration, frame scaling and absorption correction), the CrysAlisPro software package was used. A single-crystal of an orthoenstatite ( $(\text{Mg}_{1.93}, \text{Fe}_{0.06})(\text{Si}_{1.93}, \text{Al}_{0.06})\text{O}_6$ , *Pbca*,  $a = 8.8117(2)$ ,  $b = 5.18320(10)$ ,  $c = 18.2391(3)$   $\text{\AA}$ ), was used to calibrate the instrument model in the CrysAlisPro software (sample-to-detector distance, the detector's origin, offsets of the goniometer angles and rotation of the X-ray beam and the detector around the instrument axis).

## Single-crystal X-ray diffraction refinement

The crystal structures of the new compounds  $\gamma\text{-ZrB}_2\text{O}_5$  and  $\gamma\text{-HfB}_2\text{O}_5$  were determined by the dual space method using the SHELXT software.<sup>[2]</sup> After the structure solution, most of the atoms were found and the remaining were located from a series of difference Fourier maps. The crystal structures were refined against  $F^2$  on all data by full-matrix least squares with the SHELXL software.<sup>[3]</sup>

## Results and Discussion

**Table S1.** Crystallographic data and refinement parameters for  $\beta$ -ZrB<sub>2</sub>O<sub>5</sub> for all pressure steps.

| Pressure, GPa                                               | 2.2                     | 16.01     | 23.8      | 33.8      | 43.68     | 53.9      | 69.3      | 75        | 79.3      | 85.4      | 89.7      | 94.6      | 100.6     | 105       | 109.4     | 114.3 | 119.6    |
|-------------------------------------------------------------|-------------------------|-----------|-----------|-----------|-----------|-----------|-----------|-----------|-----------|-----------|-----------|-----------|-----------|-----------|-----------|-------|----------|
| Space group                                                 | <i>P2<sub>1</sub>/c</i> |           |           |           |           |           |           |           |           |           |           |           |           |           |           |       |          |
| <i>a</i> , Å                                                | 4.377(1)                | 4.292(1)  | 4.247(1)  | 4.199(1)  | 4.155(1)  | 4.115(1)  | 4.060(1)  | 4.040(1)  | 4.026(1)  | 4.005(1)  | 3.988(1)  | 3.969(1)  | 3.965(1)  | 3.956(1)  | 3.951(1)  |       | 3.901(2) |
| <i>b</i> , Å                                                | 6.903(1)                | 6.811(1)  | 6.769(1)  | 6.715(1)  | 6.666(1)  | 6.609(1)  | 6.575(1)  | 6.534(1)  | 6.519(1)  | 6.513(1)  | 6.502(1)  | 6.497(1)  | 6.466(1)  | 6.432(1)  | 6.426(2)  |       | 6.434(2) |
| <i>c</i> , Å                                                | 8.948(1)                | 8.800(1)  | 8.726(1)  | 8.644(1)  | 8.564(1)  | 8.498(1)  | 8.41(2)   | 8.377(1)  | 8.352(1)  | 8.31(1)   | 8.294(1)  | 8.270(1)  | 8.245(1)  | 8.232(1)  | 8.200(1)  |       | 8.110(4) |
| $\beta$ , deg                                               | 90.99(1)                | 91.38(1)  | 91.61(1)  | 91.83(1)  | 91.99(1)  | 92.03(1)  | 92.39(2)  | 92.41(1)  | 92.47(1)  | 92.75(2)  | 92.63(1)  | 92.75(2)  | 92.72(2)  | 92.77(2)  | 93.01(2)  |       | 92.95(8) |
| <i>V</i> , Å <sup>3</sup>                                   | 270.27(2)               | 257.15(3) | 250.78(2) | 243.45(2) | 237.05(3) | 230.98(3) | 224.24(6) | 220.90(2) | 218.96(3) | 216.66(3) | 214.82(3) | 212.99(5) | 211.13(5) | 209.21(4) | 207.88(6) |       | 203.3(1) |
| <i>Z</i>                                                    | 4                       |           |           |           |           |           |           |           |           |           |           |           |           |           |           |       |          |
| <i>Data collection and refinement</i>                       |                         |           |           |           |           |           |           |           |           |           |           |           |           |           |           |       |          |
| Wavelength, Å                                               | 0.2901                  |           |           |           |           |           |           |           |           |           |           |           |           |           |           |       |          |
| Max. $\theta$ , deg                                         | 18.228                  | 17.958    | 18.102    | 18.274    | 18.123    | 18.217    | 11.101    | 18.184    | 17.648    | 17.270    | 18.005    | 17.568    | 17.598    | 17.663    | 17.699    |       | 12.833   |
| <i>R</i> <sub>1</sub> , all data                            | 0.0273                  | 0.0711    | 0.0529    | 0.0476    | 0.0281    | 0.0516    | 0.0452    | 0.0396    | 0.0272    | 0.0634    | 0.0366    | 0.0415    | 0.0504    | 0.0465    | 0.0723    |       | 0.1027   |
| <i>R</i> <sub>1</sub> , <i>I</i> > 2 $\sigma$ ( <i>I</i> )  | 0.0266                  | 0.0704    | 0.0523    | 0.0454    | 0.0271    | 0.0505    | 0.0439    | 0.0383    | 0.0266    | 0.0627    | 0.0354    | 0.0402    | 0.0491    | 0.0440    | 0.0679    |       | 0.0826   |
| <i>wR</i> <sub>2</sub> , all data                           | 0.0725                  | 0.1806    | 0.1529    | 0.1156    | 0.0734    | 0.1517    | 0.1276    | 0.0994    | 0.0715    | 0.1694    | 0.0998    | 0.1114    | 0.1263    | 0.1194    | 0.1836    |       | 0.2302   |
| <i>wR</i> <sub>2</sub> , <i>I</i> > 2 $\sigma$ ( <i>I</i> ) | 0.0706                  | 0.1769    | 0.1506    | 0.1129    | 0.0721    | 0.1492    | 0.1260    | 0.0968    | 0.0707    | 0.1982    | 0.0975    | 0.1096    | 0.1239    | 0.1132    | 0.1737    |       | 0.2066   |
| Goof                                                        | 1.117                   | 1.078     | 1.110     | 1.044     | 1.083     | 1.117     | 1.197     | 1.057     | 1.087     | 1.158     | 1.036     | 1.078     | 1.077     | 1.095     | 1.043     |       | 1.075    |

**Table S2.** Crystallographic data and refinement parameters for  $\beta$ -HfB<sub>2</sub>O<sub>5</sub> for all pressure steps.

| Pressure, GPa                                                | 2.2                                | 16.01     | 23.8      | 33.8      | 43.68     | 53.9     | 69.3     | 75       | 79.3     | 85.4     | 89.7     | 94.6     | 100.6    | 105      | 109.4    | 114.3    | 119.6    |
|--------------------------------------------------------------|------------------------------------|-----------|-----------|-----------|-----------|----------|----------|----------|----------|----------|----------|----------|----------|----------|----------|----------|----------|
| Space group                                                  | <i>P</i> 2 <sub>1</sub> / <i>c</i> |           |           |           |           |          |          |          |          |          |          |          |          |          |          |          |          |
| <i>a</i> , Å                                                 | 4.360(1)                           | 4.280(1)  | 4.240(1)  | 4.192(1)  | 4.156(1)  | 4.122(1) | 4.071(1) | 4.044(1) | 4.033(1) | 4.024(1) | 4.006(1) | 3.989(1) | 3.966(1) | 3.939(1) | 3.924(1) | 3.892(1) | 3.872(1) |
| <i>b</i> , Å                                                 | 6.881(1)                           | 6.797(1)  | 6.754(1)  | 6.704(1)  | 6.672(1)  | 6.643(1) | 6.607(1) | 6.581(1) | 6.578(1) | 6.585(1) | 6.583(1) | 6.581(1) | 6.568(1) | 6.530(2) | 6.510(1) | 6.431(1) | 6.410(1) |
| <i>c</i> , Å                                                 | 8.943(1)                           | 8.787(1)  | 8.696(1)  | 8.608(1)  | 8.488(1)  | 8.370(1) | 8.264(1) | 8.230(1) | 8.186(1) | 8.11(1)  | 8.080(1) | 8.06(1)  | 8.05(2)  | 8.07(2)  | 8.08(2)  | 8.168(2) | 8.18(2)  |
| $\beta$ , deg                                                | 90.82(1)                           | 91.26(1)  | 91.41(1)  | 91.61(1)  | 91.61(1)  | 92.20(2) | 92.26(2) | 92.46(2) | 92.45(2) | 92.75(2) | 92.75(2) | 92.79(2) | 92.91(3) | 93.18(4) | 93.15(4) | 92.90(4) | 92.92(6) |
| <i>V</i> , Å <sup>3</sup>                                    | 268.27(8)                          | 255.54(9) | 248.95(9) | 241.76(2) | 235.22(2) | 229.0(2) | 222.1(2) | 218.8(2) | 217.0(2) | 214.8(3) | 212.8(2) | 211.3(3) | 209.4(3) | 207.2(5) | 206.1(4) | 204.2(4) | 202.8(6) |
| <i>Z</i>                                                     | 4                                  |           |           |           |           |          |          |          |          |          |          |          |          |          |          |          |          |
| <i>Data collection and refinement</i>                        |                                    |           |           |           |           |          |          |          |          |          |          |          |          |          |          |          |          |
| Wavelength, Å                                                | 0.2901                             |           |           |           |           |          |          |          |          |          |          |          |          |          |          |          |          |
| Max. $\theta$ , deg                                          | 18.294                             | 17.865    | 18.022    | 17.260    | 17.507    | 17.697   | 13.069   | 17.418   | 17.466   | 17.270   | 17.336   | 17.240   | 17.289   | 17.216   | 17.270   | 17.462   | 17.521   |
| <i>R</i> <sub>1</sub> , all data                             | 0.0302                             | 0.0457    | 0.0336    | 0.0539    | 0.0372    | 0.0540   | 0.0406   | 0.0555   | 0.0257   | 0.0325   | 0.0311   | 0.0530   | 0.0522   | 0.0758   | 0.0548   | 0.0280   | 0.0573   |
| <i>R</i> <sub>1</sub> , <i>I</i> > 2 $\sigma$ ( <i>I</i> )   | 0.0295                             | 0.0445    | 0.0324    | 0.0530    | 0.0366    | 0.0526   | 0.0385   | 0.0549   | 0.0249   | 0.0318   | 0.0308   | 0.0521   | 0.0498   | 0.0735   | 0.0529   | 0.0272   | 0.0564   |
| w <i>R</i> <sub>2</sub> , all data                           | 0.0798                             | 0.1203    | 0.0873    | 0.1509    | 0.1073    | 0.1423   | 0.1082   | 0.1588   | 0.0637   | 0.0954   | 0.0822   | 0.1492   | 0.1471   | 0.2339   | 0.1681   | 0.742    | 0.1482   |
| w <i>R</i> <sub>2</sub> , <i>I</i> > 2 $\sigma$ ( <i>I</i> ) | 0.0791                             | 0.1171    | 0.0860    | 0.1501    | 0.1069    | 0.1390   | 0.1064   | 0.1577   | 0.0631   | 0.0945   | 0.0819   | 0.1471   | 0.1437   | 0.2285   | 0.1647   | 0.729    | 0.1466   |
| Goof                                                         | 1.143                              | 1.128     | 1.172     | 1.153     | 1.199     | 1.188    | 1.198    | 1.217    | 1.131    | 1.132    | 1.066    | 1.073    | 1.163    | 1.142    | 1.191    | 1.091    | 1.125    |

**Table S3.** Interatomic B–O distances /Å for  $\beta$ -ZrB<sub>2</sub>O<sub>5</sub> and  $\beta$ -HfB<sub>2</sub>O<sub>5</sub> at 119.6 GPa (standard deviations in parentheses).

| $\beta$ -ZrB <sub>2</sub> O <sub>5</sub> |     |             |             |     |             |
|------------------------------------------|-----|-------------|-------------|-----|-------------|
| B1                                       | –O4 | 1.28(9)     | B2          | –O2 | 1.36(4)     |
|                                          | –O2 | 1.33(5)     |             | –O1 | 1.39(5)     |
|                                          | –O3 | 1.33(9)     |             | –O3 | 1.4(1)      |
|                                          | –O5 | 1.33(5)     |             | –O4 | 1.72(2)     |
| $\emptyset$                              |     | <b>1.32</b> | $\emptyset$ |     | <b>1.47</b> |
| $\beta$ -HfB <sub>2</sub> O <sub>5</sub> |     |             |             |     |             |
| B1                                       | –O5 | 1.35(1)     | B2          | –O1 | 1.352(6)    |
|                                          | –O3 | 1.36(2)     |             | –O2 | 1.360(6)    |
|                                          | –O2 | 1.37(2)     |             | –O3 | 1.38(2)     |
|                                          | –O4 | 1.39(2)     |             | –O4 | 1.45(2)     |
| $\emptyset$                              |     | <b>1.37</b> | $\emptyset$ |     | <b>1.38</b> |

**Table S4.** Bond angles /deg for  $\beta$ -ZrB<sub>2</sub>O<sub>5</sub> and  $\beta$ -HfB<sub>2</sub>O<sub>5</sub> at 119.6 GPa (standard deviations in parentheses).

| $\beta$ -ZrB <sub>2</sub> O <sub>5</sub> |            |             |            |
|------------------------------------------|------------|-------------|------------|
| O4–B1–O3                                 | 92(3)      | O2–B2–O4    | 91(5)      |
| O2–B1–O5                                 | 105(3)     | O1–B2–O4    | 102(6)     |
| O2–B1–O3                                 | 108(3)     | O3–B2–O4    | 104(4)     |
| O4–B1–O5                                 | 113(4)     | O2–B2–O3    | 116(6)     |
| O4–B1–O2                                 | 115(8)     | O2–B2–O1    | 118(3)     |
| O5–B1–O3                                 | 125(8)     | O1–B2–O3    | 118(5)     |
| $\emptyset$                              | <b>110</b> | $\emptyset$ | <b>108</b> |
| $\beta$ -HfB <sub>2</sub> O <sub>5</sub> |            |             |            |
| O2–B1–O4                                 | 100.0(6)   | O2–B2–O4    | 99(1)      |
| O5–B1–O2                                 | 105.9(5)   | O3–B2–O4    | 104.1(6)   |
| O2–B1–O4                                 | 106(2)     | O1–B2–O4    | 112(2)     |
| O3–B1–O2                                 | 110.8(6)   | O2–B2–O3    | 112(2)     |
| O5–B1–O4                                 | 112.6(8)   | O1–B2–O3    | 113(1)     |
| O5–B1–O3                                 | 120(2)     | O1–B2–O2    | 115.3(4)   |
| $\emptyset$                              | <b>109</b> | $\emptyset$ | <b>109</b> |

**Table S5.** Charge distributions according to the CHARDI ( $\sum Q$ ) concept.

| $\gamma$ -ZrB <sub>2</sub> O <sub>5</sub> | Zr1  | B1   | B2   | O1    | O2    | O3    | O4    | O5    |
|-------------------------------------------|------|------|------|-------|-------|-------|-------|-------|
| $\sum Q$                                  | 4.07 | 2.91 | 3.02 | -2.09 | -2.04 | -1.72 | -1.94 | -2.21 |
| $\gamma$ -HfB <sub>2</sub> O <sub>5</sub> | Hf1  | B1   | B2   | O1    | O2    | O3    | O4    | O5    |
| $\sum Q$                                  | 4.06 | 2.94 | 3.00 | -1.94 | -2.13 | -2.07 | -2.21 | -1.64 |

**Table S6.** Cation radii ( $r$ ) and bulk moduli ( $K_0$ ) of the cation polyhedra in the crystal structures of datolite, hingganite-(Y), and  $\beta$ -ZrB<sub>2</sub>O<sub>5</sub>.

|                                            | MO <sub>8</sub>  |                        |                    | T1O <sub>4</sub> |                        |                    | T2O <sub>4</sub> |                        |                    | Unit cell          |
|--------------------------------------------|------------------|------------------------|--------------------|------------------|------------------------|--------------------|------------------|------------------------|--------------------|--------------------|
|                                            | M                | $r / \text{\AA}^{[6]}$ | $K_0 / \text{GPa}$ | T1               | $r / \text{\AA}^{[6]}$ | $K_0 / \text{GPa}$ | T2               | $r / \text{\AA}^{[6]}$ | $K_0 / \text{GPa}$ | $K_0 / \text{GPa}$ |
| Datolite <sup>[4]</sup>                    | Ca <sup>2+</sup> | 1.12                   | 76(5)              | Si <sup>4+</sup> | 0.26                   | 325(14)            | B <sup>3+</sup>  | 0.11                   | 314(34)            | 106(4)             |
| Hingganite-(Y) <sup>[5]</sup>              | Y <sup>3+</sup>  | 1.019                  | 118(5)             | Si <sup>4+</sup> | 0.26                   | 283(28)            | Be <sup>2+</sup> | 0.27                   | 212(19)            | 124(1)             |
| $\beta$ -ZrB <sub>2</sub> O <sub>5</sub> * | Zr <sup>4+</sup> | 0.84                   | 242(5)             | B <sup>3+</sup>  | 0.11                   | 350(10)            | B <sup>3+</sup>  | 0.11                   | 470(11)            | 228(1)             |

\* The evolution of the unit cell volume and polyhedral volumes as a function of pressure was fit using second-order Birch-Murnaghan equation of state.

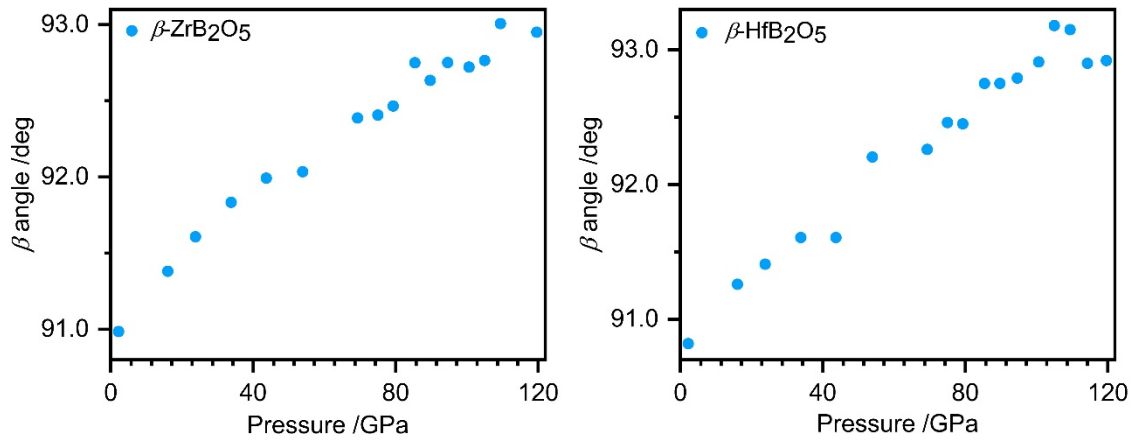

**Figure S1.** Development of the  $\beta$  angle in  $\beta\text{-ZrB}_2\text{O}_5$  (left) and  $\beta\text{-HfB}_2\text{O}_5$  (right).

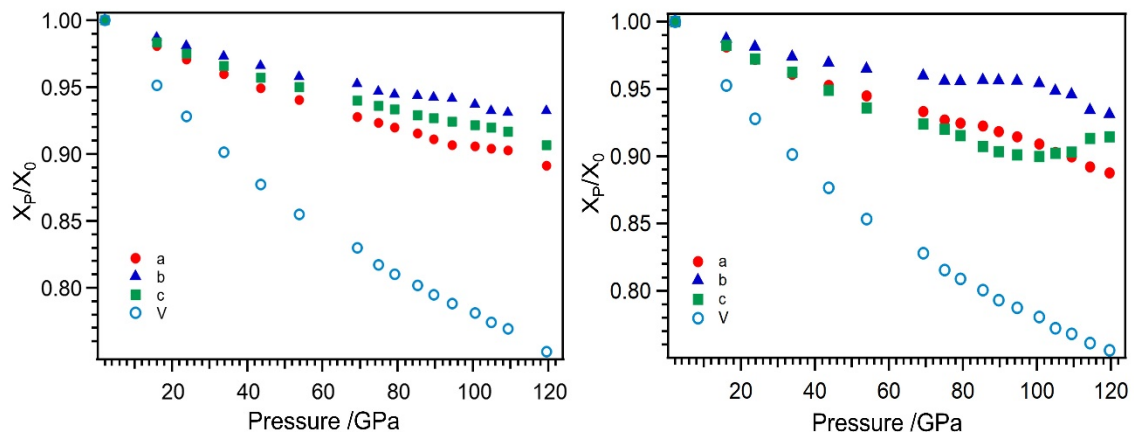

**Figure S2.** Normalized unit cell parameters for  $\text{ZrB}_2\text{O}_5$  (left) and  $\text{HfB}_2\text{O}_5$  (right).



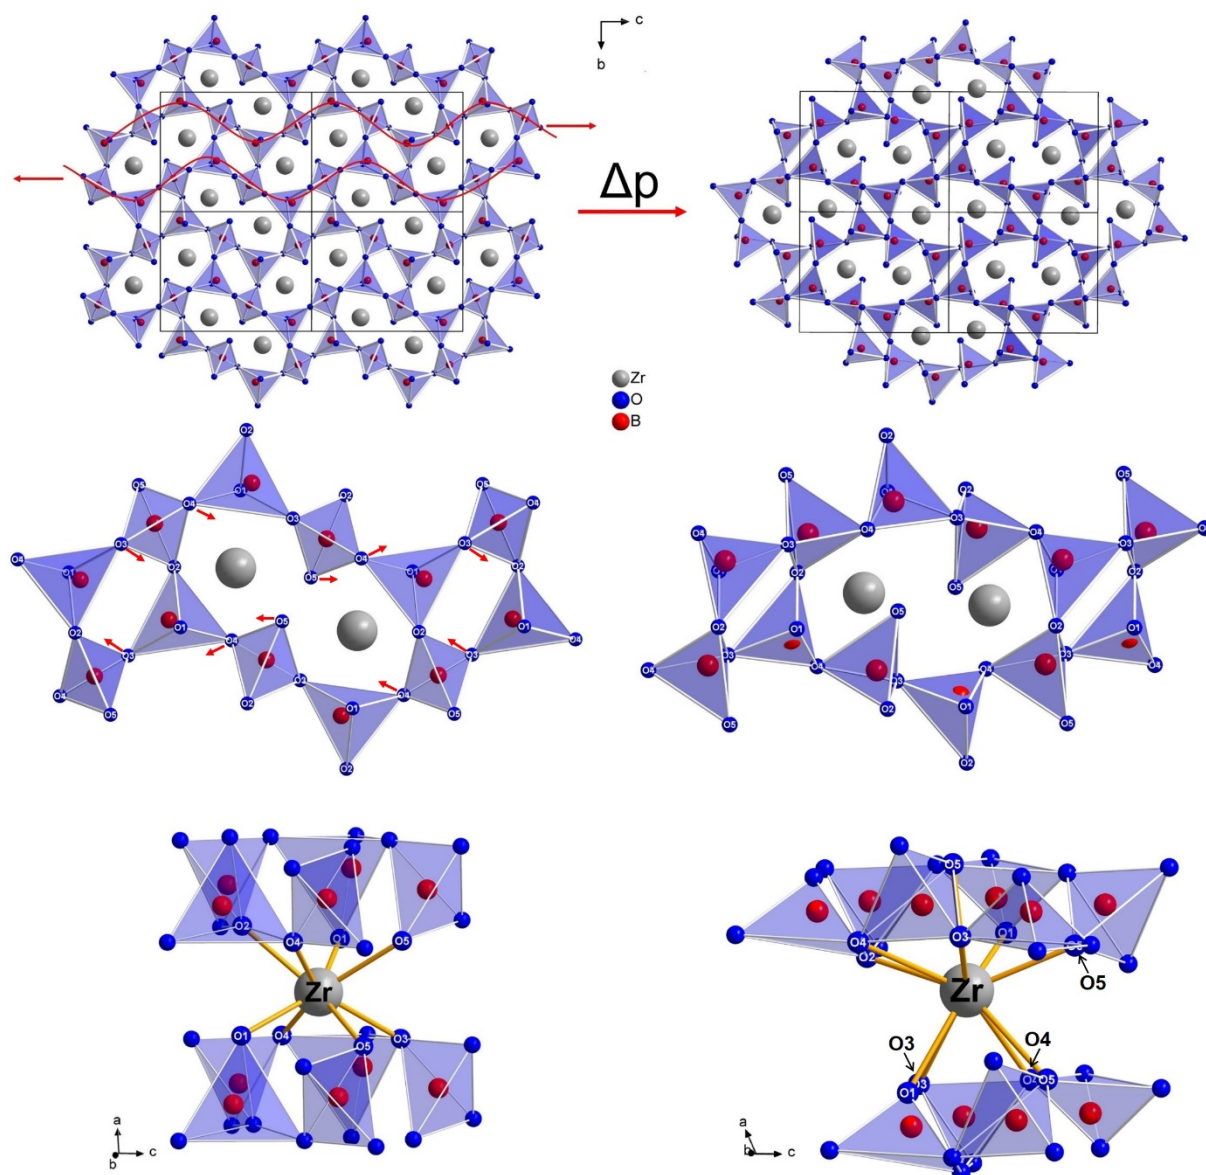

**Figure S3.** Displacive phase transition from  $\beta$ -ZrB<sub>2</sub>O<sub>5</sub> (left) to  $\gamma$ -ZrB<sub>2</sub>O<sub>5</sub> (right) at high pressure. Top: The BO<sub>4</sub> tetrahedra along the wavelike arrangement (marked red on the right) orient themselves in direction of the red arrows. Middle: Comparison of the four- and eight-membered rings. Red arrows indicate the shift caused by the transition from  $\beta$ - to  $\gamma$ -phase. Bottom: Coordination of the Zr<sup>4+</sup> cation between the layers (the  $\gamma$ -phase was transformed into the space group  $P2_1/c$  for a better comparison).

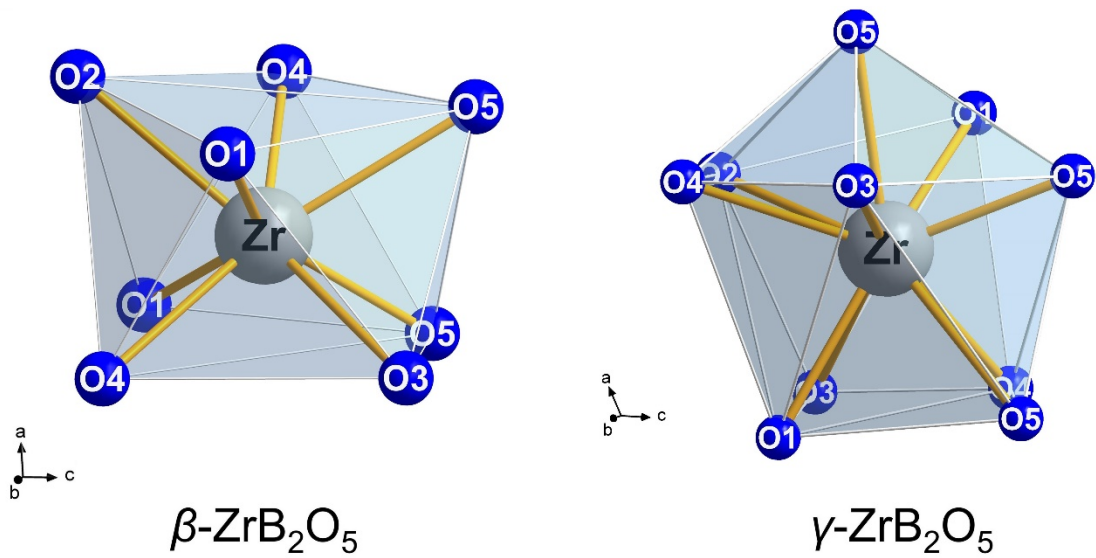

**Figure S4.** Comparison of the Zr<sup>4+</sup> coordination in  $\beta$ -ZrB<sub>2</sub>O<sub>5</sub> (eightfold; left) and  $\gamma$ -ZrB<sub>2</sub>O<sub>5</sub> (tenfold; right).

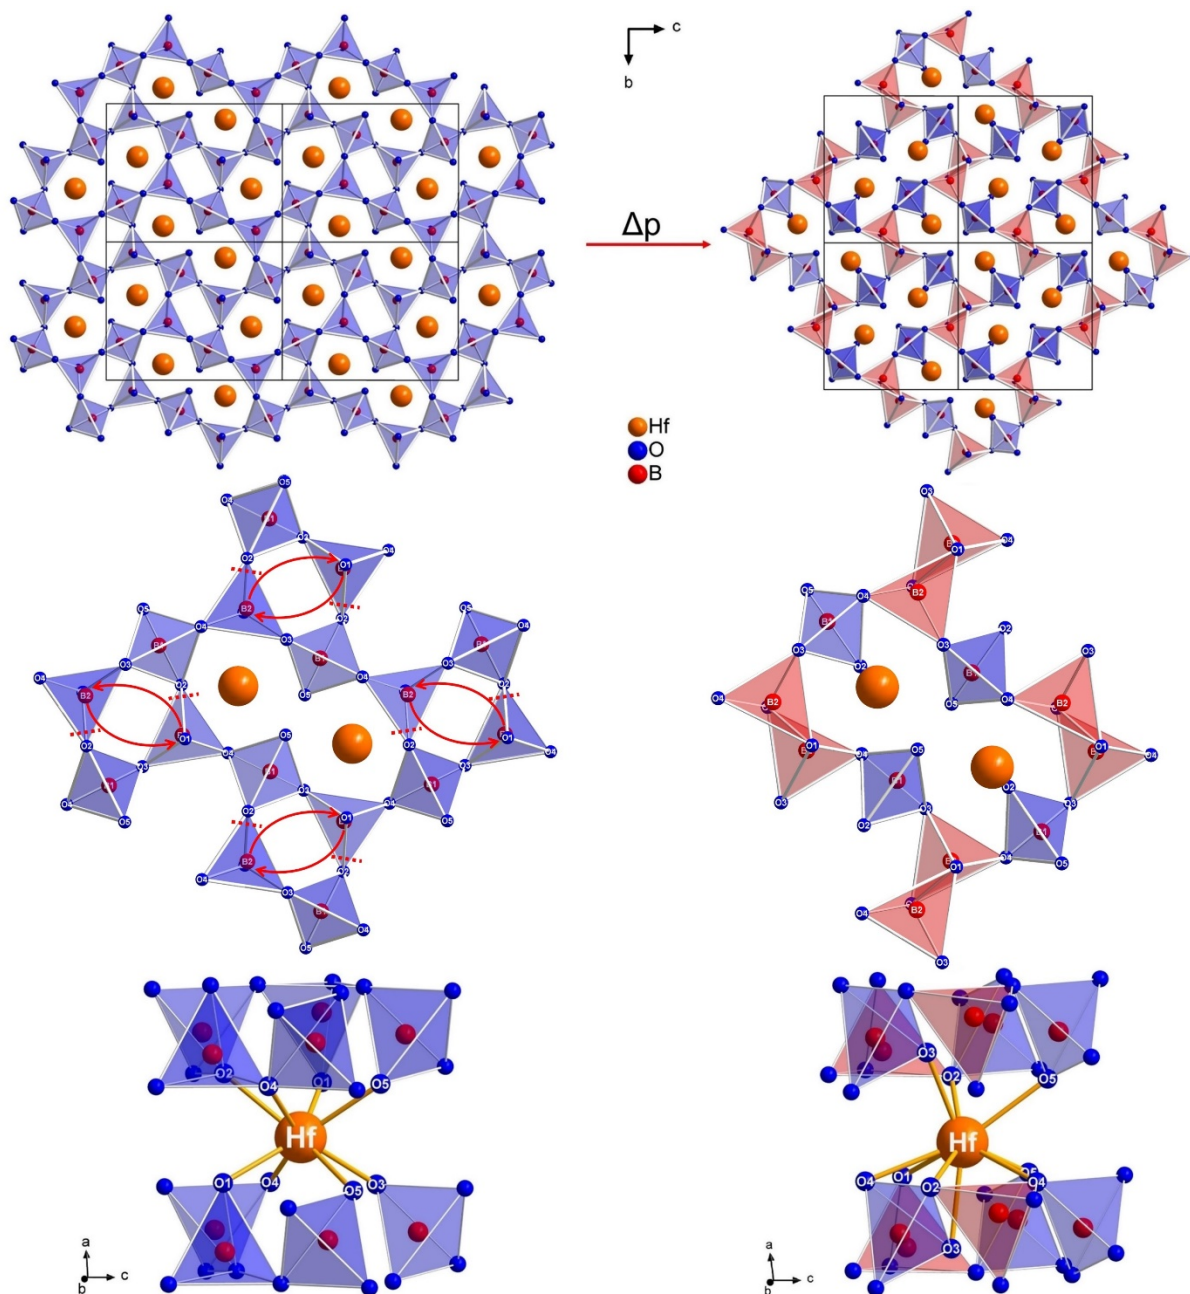

**Figure S5.** Top: Reconstructive phase transition from  $\beta$ -HfB<sub>2</sub>O<sub>5</sub> (left) to  $\gamma$ -HfB<sub>2</sub>O<sub>5</sub> (right) at high pressure. Middle: Red dotted lines indicate the bonds that are broken during the phase transition. Red arrows show the formation of new bonds between B2 and O1 atoms that subsequently form the edge-sharing BO<sub>4</sub> tetrahedra. Bottom: Coordination of the Hf<sup>4+</sup> cation between the layers.

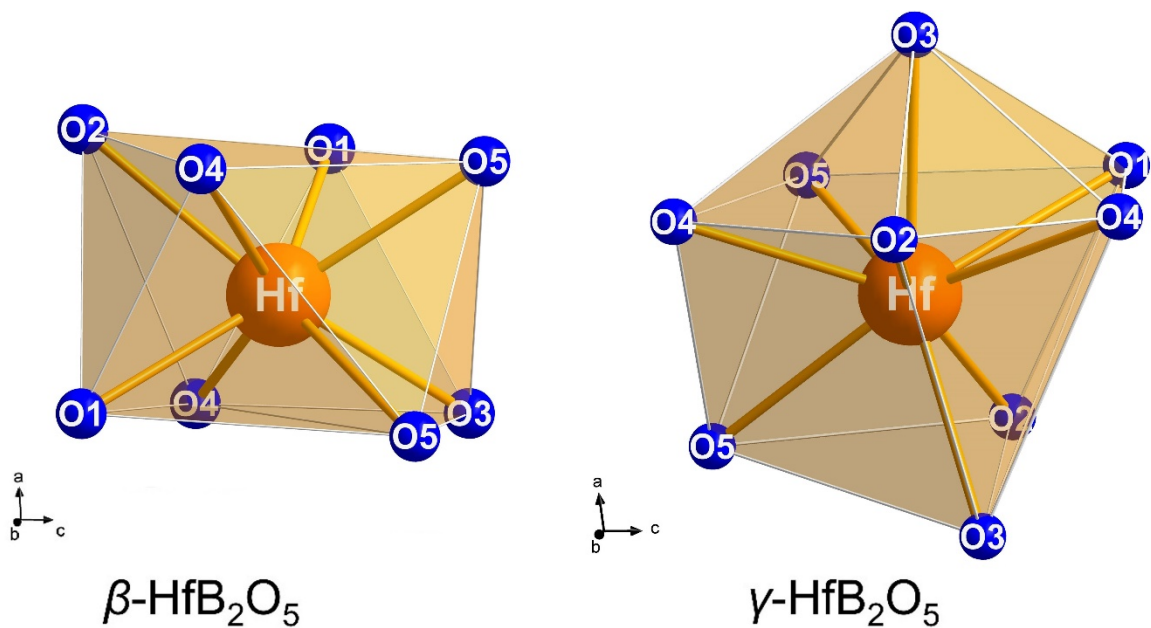

**Figure S6.** Comparison of the Hf<sup>4+</sup> coordination in  $\beta$ -HfB<sub>2</sub>O<sub>5</sub> (eightfold; left) and  $\gamma$ -HfB<sub>2</sub>O<sub>5</sub> (ninefold; right).

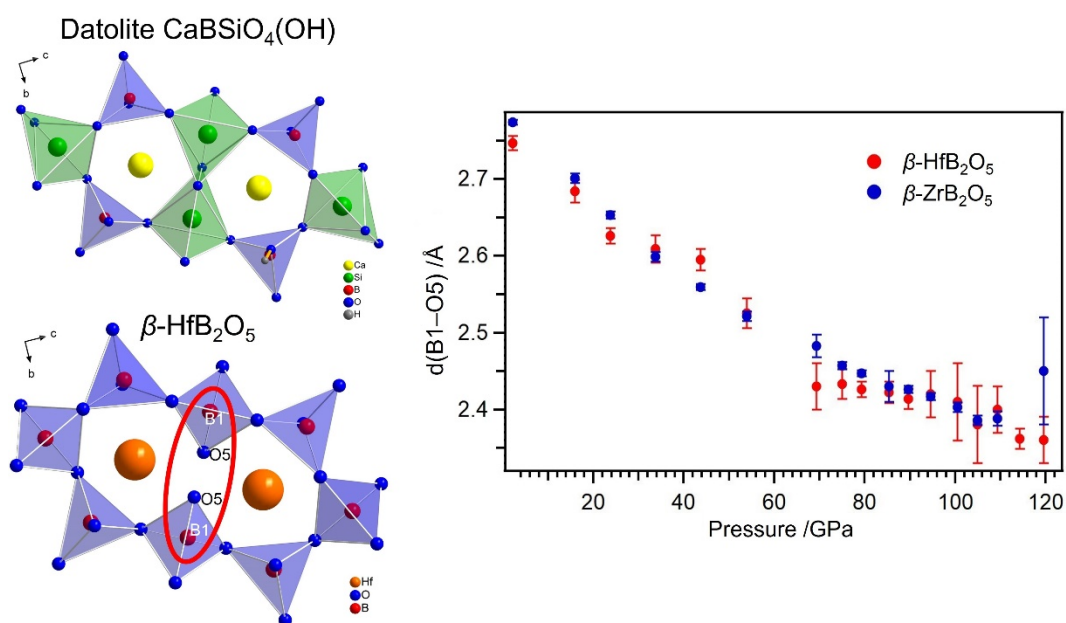

**Figure S7.** Comparison of the resulting five-membered rings in datolite (top left) and the remaining eight-membered ring in  $\beta$ -HfB<sub>2</sub>O<sub>5</sub> (bottom left) and evolution of the B1–O5 distance in  $\beta$ -ZrB<sub>2</sub>O<sub>5</sub> and  $\beta$ -HfB<sub>2</sub>O<sub>5</sub> (right).

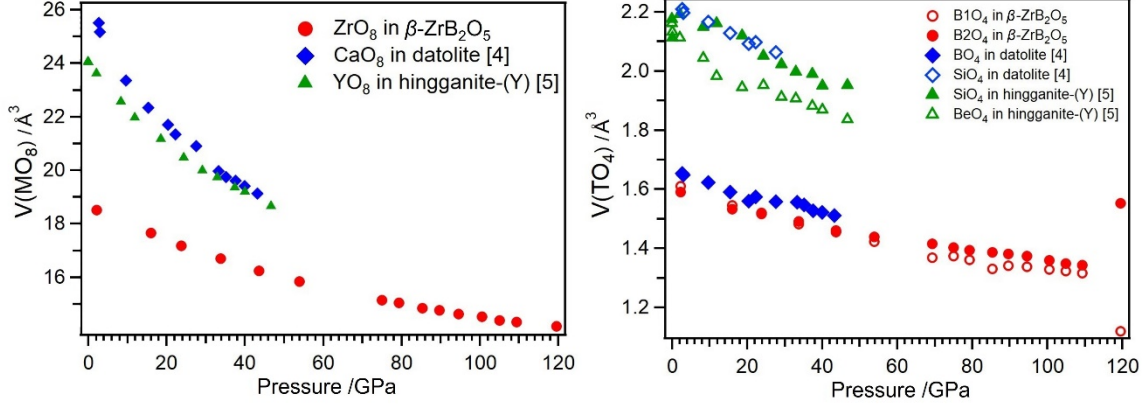

**Figure S8.** Pressure dependencies of the volumes of the  $MO_8$  ( $M = \text{Zr}, \text{Ca}, \text{Y}$ ; left) and  $TO_4$  ( $T = \text{Si}, \text{Be}, \text{B}$ ; right) coordination polyhedra in the crystal structures of  $\beta\text{-ZrB}_2\text{O}_5$ , datolite  $\text{CaBSiO}_4(\text{OH})$ ,<sup>[4]</sup> and hingganite-(Y)  $\text{YBeSiO}_4(\text{OH})$ .<sup>[5]</sup>

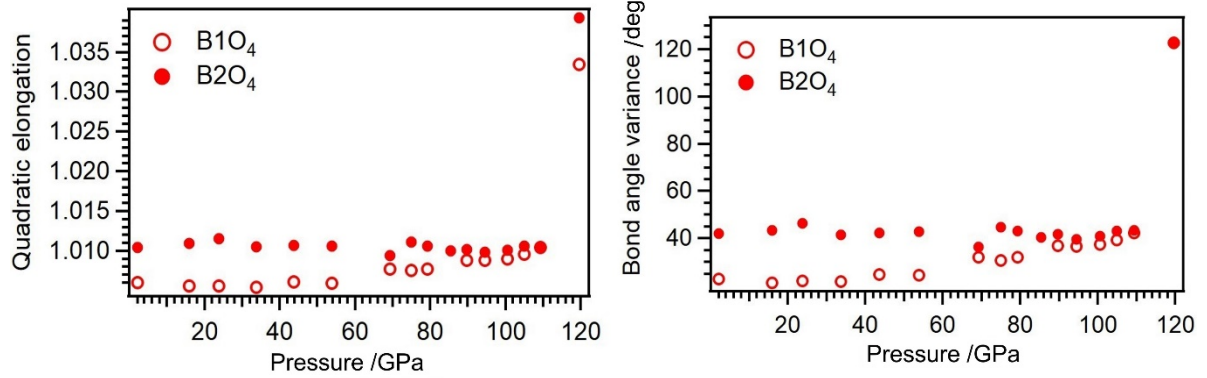

**Figure S9.** The evolution of the quadratic elongation (QE; left) and bond angle variance (BAV, deg; right) of the  $\text{BO}_4$  tetrahedra along the compression of  $\beta\text{-ZrB}_2\text{O}_5$ . The parameters QE and BAV show the deviation of  $\text{TO}_4$  polyhedra from the ideal tetrahedral geometry and are

defined as:  $\text{QE} = \frac{1}{4} \sum_{i=1}^4 \left( \frac{l_i}{l_0} \right)^2$  and  $\text{BAV} = \sqrt{\frac{1}{5} \sum_{i=1}^6 (\theta_i - 109.47)^2}$  where  $l_0$  is a center-to-vertex distance for the ideal tetrahedron whose volume is equal to that of the distorted tetrahedron with bond lengths  $l_i$  and bond angles  $\theta_i$ .<sup>[6]</sup>

## References

- [1] C. Prescher, V. B. Prakapenka, *High Pressure Res.* **2015**, *35*, 223-230.
- [2] G. M. Sheldrick, *Acta Crystallogr.* **2015**, *C71*, 3-8.
- [3] G. M. Sheldrick, *Acta Crystallogr.* **2008**, *A64*, 112-122.
- [4] L. A. Gorelova, A. S. Pakhomova, G. Aprilis, L. S. Dubrovinsky, S. V. Krivovichev, *Inorg. Chem. Front.* **2018**, *5*, 1653–1660.
- [5] L. A. Gorelova, A. S. Pakhomova, S. V. Krivovichev, A. V. Kasatkin, L. S. Dubrovinsky, *Phys. Chem. Minerals* **2020**, *47*, 22.
- [6] K. Robinson, G. V. Gibbs, P. H. Ribbe, *Science* **1971**, *172*, 567-570.
